# Supplementary material for: Systems Drug Discovery for Diffuse Large B Cell Lymphoma Based on Pathogenic Molecular Mechanism via Big Data Mining and Deep Learning Method
Source: MDPI journal article supplement (doi:10.3390/ijms23126732), 2022-06-16
Supplement: s1 [file s1]

# Supplementary

## 1.1 Systems modeling of lncRNAs and miRNAs

The expression level of lncRNA might be influenced by the regulations of TFs, lncRNA and miRNAs. Hence, the candidate lncRNA regulatory model of candidate GENs by the regulatory equations in sample  $n$  is described as follows:

$$s_v[n] = \sum_{j=1}^{J_v} \beta_{vj} z_j[n] + \sum_{\substack{w=1 \\ w \neq v}}^{W_v} \chi_{vw} x_w[n] - \sum_{h=1}^{H_v} \gamma_{vh} d_h[n] s_v[n] + \phi_v + \eta_v[n] \quad (S1)$$

for  $v = 1, \dots, V$  and  $n = 1, \dots, N$ .

where  $s_v[n]$  represents the expression level of the  $v$ -th lncRNA;  $J_v$  indicates the total number of TFs binding to the  $v$ -th lncRNA;  $W_v$  represents the total number of lncRNAs binding to the  $v$ -th lncRNA;  $H_v$  denotes the total number of miRNAs inhibiting the  $v$ -th lncRNA;  $\beta_{vj}$  denotes the transcription regulatory ability from the  $j$ -th TF to the  $v$ -th lncRNA;  $\chi_{vw}$  is the regulation ability from the  $w$ -th lncRNA to the  $v$ -th lncRNA;  $\gamma_{vh} \geq 0$  represents the post-transcriptional regulation ability with which the  $h$ -th miRNA inhibits the  $v$ -th lncRNA;  $z_j[n]$ ,  $x_w[n]$ , and  $d_h[n]$  indicate the expression of the  $j$ -th TF, the  $w$ -th lncRNA, and the  $h$ -th miRNA, respectively.  $V$  is the total number of lncRNAs and  $N$  denotes the total number of patient samples;  $\phi_v$  represents the basal level of the  $v$ -th lncRNA coming from unknown regulations;  $\eta_v[n]$  is the stochastic noise of the  $v$ -th lncRNA for the sample  $n$  caused by the modeling residue and data measurement noise.

Similarly, for the candidate miRNA regulation network (MRN) in the candidate GWGEN, the systematic regulation model is defined as below:

$$l_m[n] = \sum_{j=1}^{J_m} \sigma_{mj} z_j[n] + \sum_{w=1}^{W_m} \delta_{mw} x_w[n] - \sum_{\substack{h=1 \\ h \neq m}}^{H_m} \omega_{mh} d_h[n] l_m[n] + \phi_m + \eta_m[n] \quad (S2)$$

for  $m = 1, \dots, M$  and  $n = 1, \dots, N$ .

where  $l_m[n]$  represents the expression level of the  $m$ -th miRNA;  $J_m$  indicates the total number of TFs binding to the  $m$ -th miRNA;  $W_m$  represents the total number of lncRNAs binding to the  $m$ -th miRNA;  $H_m$  denotes the total number of miRNAs inhibiting the  $m$ -th miRNA;  $\sigma_{mj}$  denotes the transcription regulatory ability from the  $j$ -th TF to the  $m$ -th miRNA;  $\delta_{mw}$  is the regulation ability from the  $w$ -th lncRNA to the

$m$ -th miRNA;  $\omega_{mh} \geq 0$  represents the post-transcription regulatory ability with which the  $h$ -th miRNA inhibits the  $v$ -th miRNA;  $z_j[n]$ ,  $x_w[n]$ , and  $d_h[n]$  indicate the expression of the  $j$ -th TF, the  $w$ -th lncRNA, and the  $h$ -th miRNA, respectively.  $M$  is the total number of miRNAs and  $N$  denotes the total number of patient samples;  $\phi_m$  represents the basal level of the  $z$ -th miRNA due to some unknown regulations;  $\eta_m[n]$  is the stochastic noise of the  $m$ -th miRNA for the sample  $n$  owing to the modeling residue and data noise.

## 1.2 System identification and system order detection approach to lncRNA and miRNA system models

To estimate the unknown parameters for the lncRNA model in the candidate GWGEN, the lncRNA equation in equation (S1) could be rewritten as below:

$$s_v[n] = \begin{bmatrix} z_1[n] & \cdots & z_{J_v}[n] & x_1[n] & \cdots & x_{H_v}[n] & d_1[n] s_v[n] & \cdots & d_{H_v}[n] s_v[n] & 1 \end{bmatrix} \times \begin{bmatrix} \beta_{v1} \\ \vdots \\ \beta_{vH_v} \\ \chi_{v1} \\ \vdots \\ \chi_{vH_v} \\ -\gamma_{v1} \\ \vdots \\ -\gamma_{vH_v} \\ \phi_v \end{bmatrix} + \eta_v[n] \quad (S3)$$

$$= \xi_v[n] \cdot \varphi_{v,L} + \tau_v[n], \text{ for } s=1, \dots, L \text{ and } n=1, \dots, N.$$

Where  $\xi_v[n]$  determines the regression vector which could be computed by the microarray data;  $\varphi_{v,L}$  indicates the unknown parameter vector for the  $v$ -th lncRNA. The equation (S3) of the  $v$ -th lncRNA could be augmented for  $N$  samples as below:

$$\begin{bmatrix} s_v[1] \\ s_v[2] \\ \vdots \\ s_v[N] \end{bmatrix} = \begin{bmatrix} \xi_{v,L}[1] \\ \xi_{v,L}[2] \\ \vdots \\ \xi_{v,L}[N] \end{bmatrix} \cdot \varphi_{v,L} + \begin{bmatrix} \tau_v[1] \\ \tau_v[2] \\ \vdots \\ \tau_v[N] \end{bmatrix} \quad (S4)$$

Furthermore, we simplified (S4) to the following form:

$$S_v = \Xi_{v,L} \cdot \varphi_{v,L} + T_v \quad (S5)$$

Therefore, the unknown parameters in the vector  $\varphi_{v,L}$  could be estimated by solving



$$L_m = \Xi_{m,M} \cdot \varphi_{m,M} + T_m \quad (S9)$$

Hence, by solving the following constrained linear least square estimation problem, we could have the estimated regulatory parameters in the vector  $\varphi_{m,M}$ .

$$\hat{\varphi}_{m,M} = \min_{\varphi_{m,M}} \frac{1}{2} \|\Xi_{m,M} \cdot \varphi_{m,M} - L_m\|_2^2 \quad (S10)$$

$$\text{subject to } \begin{bmatrix} 0 & \cdots & \cdots & 0 & | & 0 & \cdots & \cdots & 0 & | & 1 & 0 & \cdots & 0 & | & 0 \\ \vdots & & & \vdots & | & \vdots & & & \vdots & | & 0 & \ddots & \ddots & \vdots & | & \vdots \\ \vdots & & & \vdots & | & \vdots & & & \vdots & | & 0 & \ddots & \ddots & 0 & | & \vdots \\ 0 & \cdots & \cdots & 0 & | & 0 & \cdots & \cdots & 0 & | & 0 & \cdots & 0 & 1 & | & 0 \end{bmatrix} \varphi_{m,M} \leq \begin{bmatrix} 0 \\ \vdots \\ \vdots \\ 0 \end{bmatrix}$$

$J_m$                        $W_m$                        $H_m$

where  $\hat{\varphi}_{m,M}$  is the estimated vector containing estimated regulatory parameters in the equation (S2). Meanwhile, the miRNA repression parameters  $\omega_{mh}$  are guaranteed to be positive (i.e.  $\omega_{mh} \geq 0$ ) for  $h = 1, \dots, H_m$ .

The derived AIC formulas for the  $v$ -th lncRNA (S11) and the  $m$ -th miRNA (S12) are given as below:

$$AIC(J_v, W_v, H_v) = \log(\hat{\rho}_{v,M}^2) + \frac{2(\theta_{v,M} + 1)}{N} \quad (S11)$$

$$\text{where } \hat{\rho}_{v,M} = \sqrt{\frac{(S_v - (\Xi_{v,M} \cdot \hat{\varphi}_{v,M}))^T (S_v - (\Xi_{v,M} \cdot \hat{\varphi}_{v,M}))}{N}}, \quad \theta_{v,M} = J_v + W_v + H_v$$

$\hat{\rho}_{v,M}$  and  $\theta_{v,M}$  represent the estimated residual error and the number of the regulations on the  $v$ -th lncRNA, respectively;  $\hat{\varphi}_{v,M}$  is the estimated parameter vector of the  $v$ -th lncRNA by solving (S5). Based on the AIC theory, the real system order  $J_v^* + W_v^* + H_v^*$  resulting in the smallest  $AIC(J_v^* + W_v^* + H_v^*)$ .

$$AIC(J_m, W_m, H_m) = \log(\hat{\rho}_{m,M}^2) + \frac{2(\theta_{m,M} + 1)}{N} \quad (S12)$$

$$\text{where } \hat{\rho}_{m,M} = \sqrt{\frac{(L_m - (\Xi_{m,M} \cdot \hat{\varphi}_{m,M}))^T (L_m - (\Xi_{m,M} \cdot \hat{\varphi}_{m,M}))}{N}}, \quad \theta_{m,M} = J_m + W_m + H_m$$

$\hat{\rho}_{m,M}$  and  $\theta_{m,M}$  represent the estimated residual error and the number of the regulations on the  $m$ -th miRNA, respectively;  $\hat{\varphi}_{m,M}$  is the estimated parameter vector of the  $m$ -th miRNA by solving (S9). Based on the AIC theory, the real system order  $J_m^* + W_m^* + H_m^*$  lead to the smallest  $AIC(J_m^* + W_m^* + H_m^*)$ .

## Tables.

**Table S1.** The statistics of nodes and edges in the candidate GWGEN and the identified real GWGENs of DLBCL ABC and DLBCL GCB.

| Node/Edge      | Candidate GWGEN | DLBCL ABC Real GWGEN | DLBCL GCB Real GWGEN |
|----------------|-----------------|----------------------|----------------------|
| LncRNA-LncRNA  | 2               | 1                    | 1                    |
| LncRNA-TF      | 199             | 65                   | 71                   |
| LncRNA-Protein | 922             | 407                  | 454                  |
| LncRNA node    | 259             | 221                  | 228                  |
| LncRNA edge    | 1216            | 515                  | 574                  |
| MiRNA-LncRNA   | 240             | 86                   | 114                  |
| MiRNA-MiRNA    | 54              | 20                   | 17                   |
| MiRNA-TF       | 17892           | 4077                 | 4794                 |
| MiRNA-Protein  | 148606          | 65234                | 73190                |
| MiRNA node     | 498             | 498                  | 498                  |
| MiRNA edge     | 188374          | 78243                | 88037                |
| TF-LncRNA      | 276             | 194                  | 213                  |
| TF-MiRNA       | 2107            | 1908                 | 1979                 |
| TF-TF          | 11839           | 6743                 | 7918                 |
| TF-Protein     | 103024          | 79021                | 84526                |
| TF node        | 798             | 729                  | 749                  |
| TF edge        | 133731          | 100339               | 108081               |
| Receptor node  | 2452            | 2457                 | 2455                 |
| Protein node   | 15347           | 15187                | 15193                |
| PPI edge       | 3997005         | 901174               | 911806               |
| Total node     | 19354           | 19092                | 19123                |
| Total edge     | 4320803         | 1080624              | 1108843              |

**Table S2.** The gene enrichment analysis results based on the genes in the core GWGEN of DLBCL ABC by DAVID.

| Pathway enrichment                   | Numbers of proteins | p-value  |
|--------------------------------------|---------------------|----------|
| Pathways in cancer                   | 109                 | 1.40E-06 |
| PI3K-Akt signaling pathway           | 88                  | 2.90E-04 |
| Chemokine signaling pathway          | 63                  | 1.80E-07 |
| Toll-like receptor signaling pathway | 40                  | 4.80E-07 |
| NF-kappa B signaling pathway         | 32                  | 1.50E-05 |

**Table S3.** The gene enrichment analysis results based on the genes in the core GWGEN of DLBCL GCB by DAVID.

| Pathway enrichment                | Numbers of proteins | p-value  |
|-----------------------------------|---------------------|----------|
| Pathways in cancer                | 108                 | 4.10E-08 |
| PI3K-Akt signaling pathway        | 85                  | 1.20E-04 |
| Chemokine signaling pathway       | 62                  | 3.70E-08 |
| MAPK signaling pathway            | 62                  | 1.30E-03 |
| T cell receptor signaling pathway | 35                  | 6.60E-05 |

**Table S4.** The drug candidates with toxicity and drug regulation ability information toward their corresponding targets.

| FOXl1         |                           |                        | NFκB1          |                           |                        |
|---------------|---------------------------|------------------------|----------------|---------------------------|------------------------|
| Drug          | Toxicity<br>(LD50,mol/kg) | Regulability<br>(CMap) | Drug           | Toxicity<br>(LD50,mol/kg) | Regulability<br>(CMap) |
| chlorzoxazone | 2.2388                    | 0.43578                | famotidine     | 1.9523                    | -0.15561               |
| cefmetazole   | 2.2638                    | 0.407316               | dacarbazine    | 1.9602                    | -0.09832               |
| nizatidine    | 2.435                     | 0.225334               | chlorzoxazone  | 2.2388                    | -0.09968               |
| ondansetron   | 2.4555                    | 0.338226               | etoposide      | 2.9588                    | -0.01479               |
| AKT1          |                           |                        | MYC            |                           |                        |
| Drug          | Toxicity<br>(LD50,mol/kg) | Regulability<br>(CMap) | Drug           | Toxicity<br>(LD50,mol/kg) | Regulability<br>(CMap) |
| famotidine    | 1.9523                    | -0.31407               | dacarbazine    | 1.9602                    | -0.35287               |
| dacarbazine   | 1.9602                    | -0.38088               | paclitaxel     | 2.4391                    | -0.32761               |
| clenbuterol   | 2.6024                    | -0.41223               | etoposide      | 2.9588                    | -0.37365               |
| ciclosporin   | 2.8788                    | -0.20654               | sulfinpyrazone | 3.0218                    | -0.34322               |
| methotrexate  | 3.4955                    | -0.39957               | methotrexate   | 3.4955                    | -0.37873               |
| STAT3         |                           |                        | EZH2           |                           |                        |
| Drug          | Toxicity<br>(LD50,mol/kg) | Regulability<br>(CMap) | Drug           | Toxicity<br>(LD50,mol/kg) | Regulability<br>(CMap) |
| dacarbazine   | 1.9602                    | -0.448                 | famotidine     | 1.9523                    | -0.4045                |
| chlorzoxazone | 2.2388                    | -0.077                 | chlorzoxazone  | 2.2388                    | -0.2908                |
| famotidine    | 2.9503                    | -0.462                 | chloroquine    | 2.9547                    | -0.4260                |
| etoposide     | 2.9588                    | -0.4939                | methotrexate   | 3.4955                    | -0.4870                |
| clonidine     | 3.503                     | -0.5041                | clonidine      | 3.5030                    | -0.4302                |

## Figures.

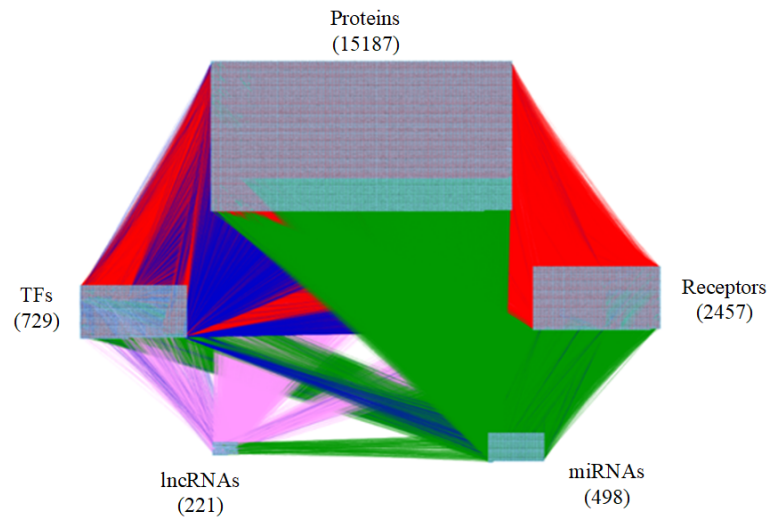

**Figure S1.** The real genome-wide genetic and epigenetic network (GWGEN) of DLBCL ABC. The red lines indicate protein-protein interactions (PPIs). The blue lines denote transcriptional regulations by TFs. The pink lines denote post-transcriptional regulations by lncRNAs; The green lines represent post-transcriptional regulations by miRNAs. The numbers of receptors, proteins, lncRNAs, TFs and miRNAs are 2546, 14149, 106, 1783 and 508, respectively.

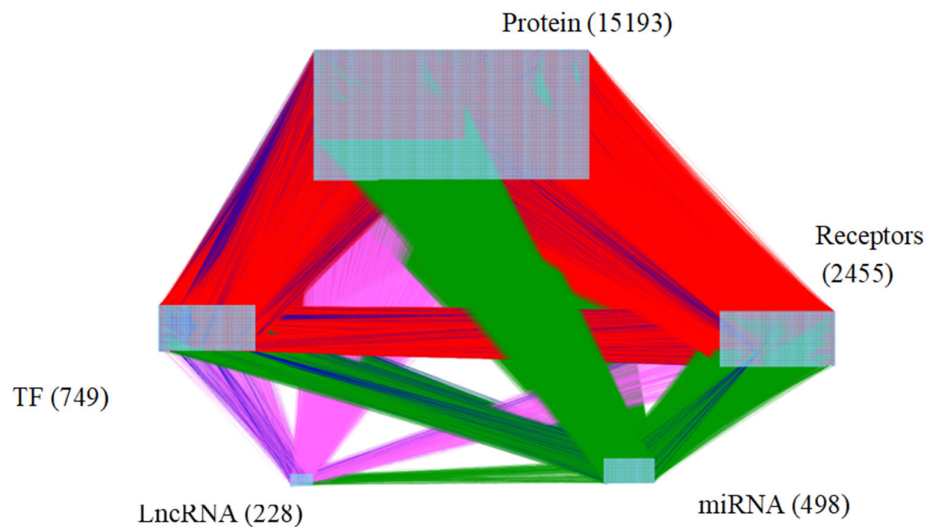

**Figure S2.** The real genome-wide genetic and epigenetic network (GWGEN) of DLBCL GCB. The red lines indicate protein-protein interactions (PPIs). The blue lines denote transcriptional regulations by TFs. The pink lines denote post-transcriptional regulations by lncRNAs. The green lines represent post-transcriptional regulations by miRNAs. The numbers of receptors, proteins, lncRNAs, TFs and miRNAs

are 2546, 14189, 111, 1769 and 508, respectively.

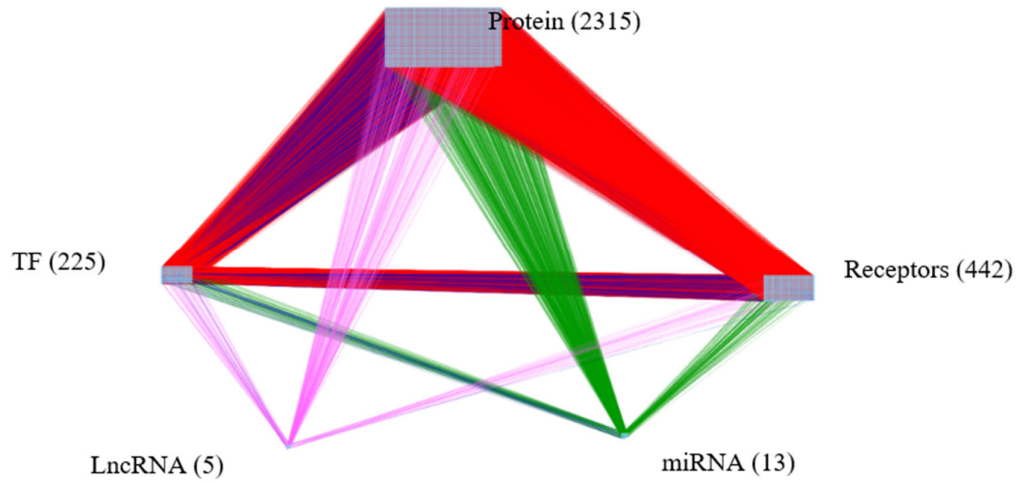

**Figure S3.** The core genome-wide genetic and epigenetic network (GWGEN) of DLBCL ABC. The red lines indicate protein-protein interactions (PPIs). The blue lines denote transcriptional regulations by TFs. The pink lines denote post-transcriptional regulations by lncRNAs. The green lines represent post-transcriptional regulations by miRNAs. The numbers of receptors, proteins, lncRNAs, TFs and miRNAs are 442, 2315, 5, 225 and 13, respectively.

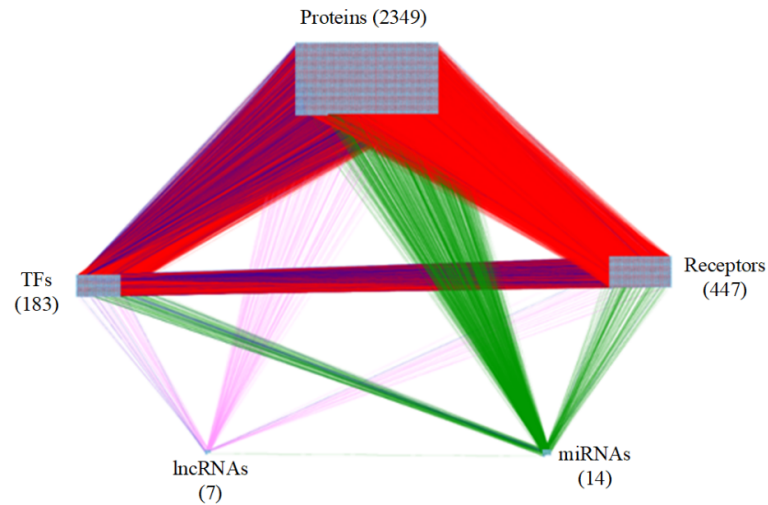

**Figure S4.** The core genome-wide genetic and epigenetic network (GWGEN) of DLBCL GCB. The red lines indicate protein-protein interactions (PPIs). The blue lines denote transcriptional regulations by TFs. The pink lines denote post-transcriptional regulations by lncRNAs. The green lines represent post-transcriptional regulations by miRNAs. The numbers of receptors, proteins, lncRNAs, TFs and miRNAs are 447, 2349, 7, 2349 and 14, respectively.



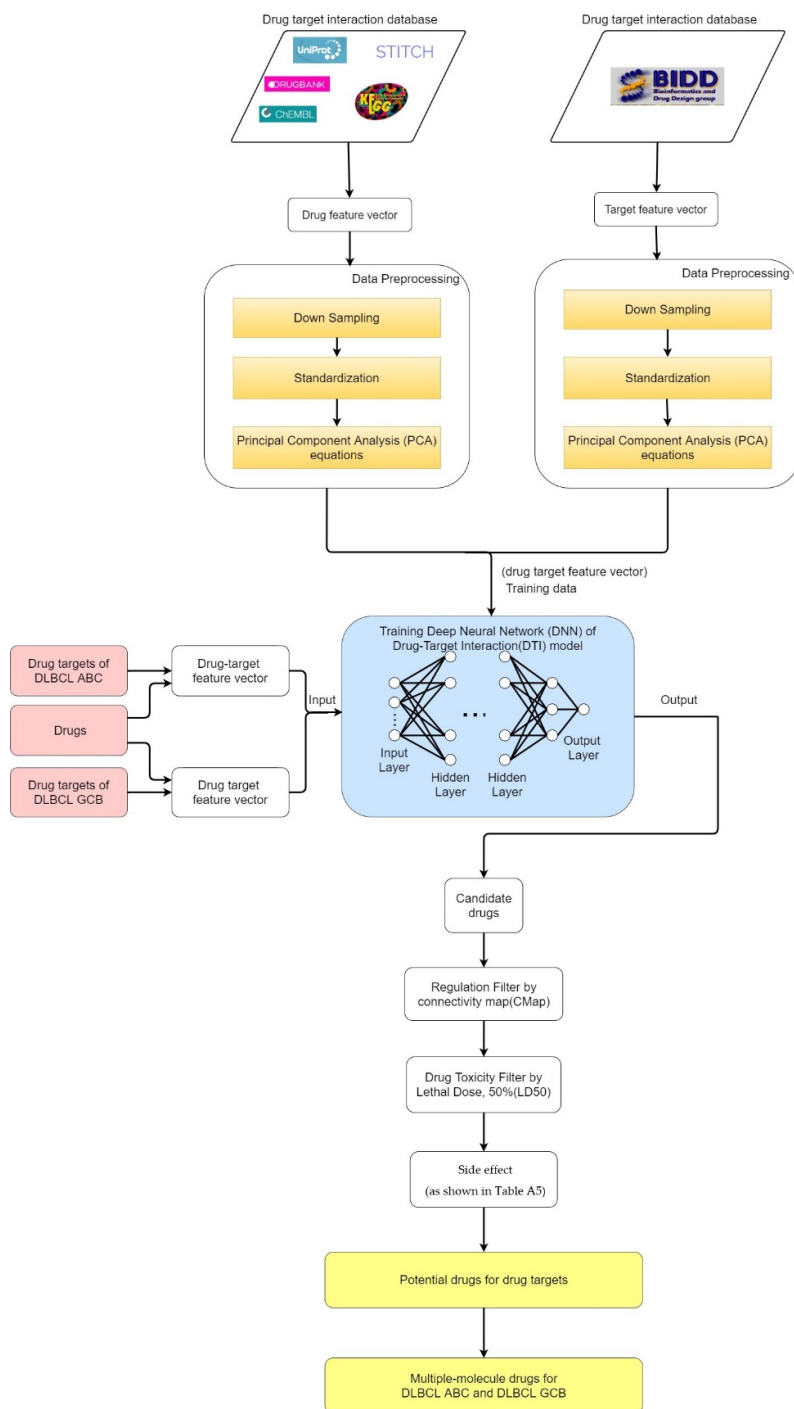

**Figure S5.** The systems drug design procedure.

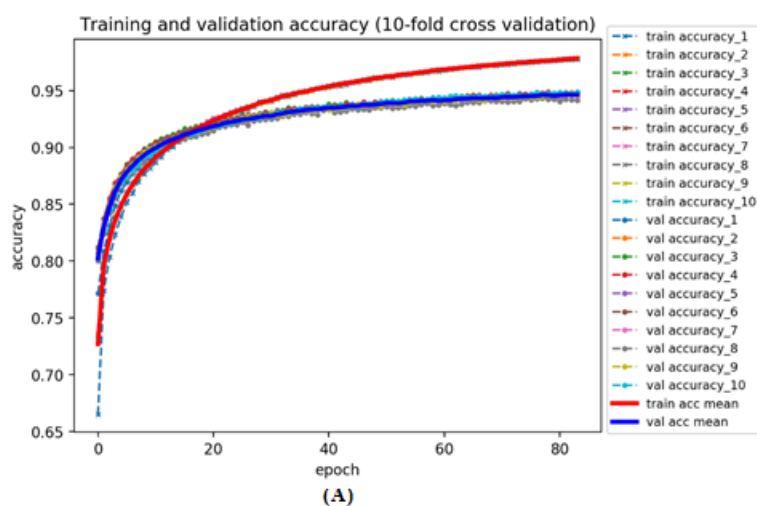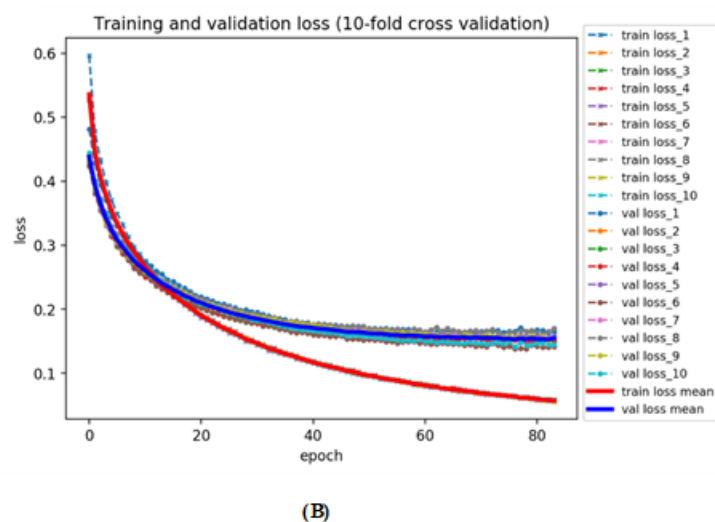

**Figure S6.** Training and Validation Learning curves (10-fold cross validation). (A) Training and validation accuracy. (B) Training and validation loss. “-x-” lines in different colors denote the training accuracy and loss, while “-o-” lines in different colors represent the validation accuracy and loss. The bold lines in red and blue indicate the model’s average loss or accuracy of training and validation, respectively.

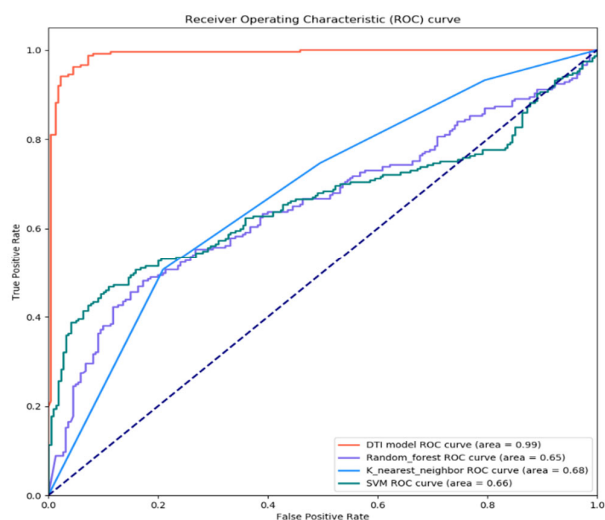

**Figure S7.** The ROC curves of different kinds of DTI models. This figure shows that the DTI model trained by DNN can achieve an AUC of 0.99, which is much better than the AUC of 0.65 by the random forest, much higher than the AUC of 0.68 by Nearest neighbor and much higher than the AUC of 0.66 by SVM. The results reflect that deep learning method is better than traditional machine learning methods. It is worth noting that the dot line is the case of AUC 0.5 as a result of the classifier following random prediction, therefore the model has no predictive value.
